# Supplementary material for: Effect of solvent nature on propylene glycol oxidation with tert-butyl hydroperoxide over metal–organic framework Cr-MIL-101
Source: Royal Society of Chemistry journal article supplement (doi:10.1039/c9ra05003e), 2019-01-01
Supplement: c9ra05003e1.pdf [file c9ra05003e1.pdf]

## Supporting Information

### Effect of solvent nature on propylene glycol oxidation with *tert*-butyl hydroperoxide over metal-organic framework Cr-MIL-101

Viktoriia Torbina, Mikhail Salaev, Olga Vodyankina \*

\*National Research Tomsk State University, Tomsk, Russia.

E-mail: vodyankina\_o@mail.ru.

**Table S1.** Bond lengths in isolated molecules and in those adsorbed on Cr sites of MOF model calculated at B3LYP/LANL2DZ/6-31G\* level of theory.

| Model                          | r(O-O) in TBHP, Å | r(C-O) in Solvent/TBHP, Å | r(O-H) in Solvent/TBHP, Å |
|--------------------------------|-------------------|---------------------------|---------------------------|
| methanol                       |                   | 1.419                     | 0.969                     |
| <i>tert</i> -butanol           |                   | 1.439                     | 0.971                     |
| n-butanol                      |                   | 1.425                     | 0.969                     |
| ethoxyethanol                  |                   | 1.422                     | 0.968                     |
| ethyl acetate                  |                   | 1.212                     | -                         |
| butyl acetate                  |                   | 1.212                     | -                         |
| acetone                        |                   | 1.216                     | -                         |
| TBHP*                          | 1.476             | 1.448                     | 0.974                     |
| MOF+methanol                   |                   | 1.439                     | 0.974                     |
| MOF+ <i>tert</i> -butanol      |                   | 1.464                     | 0.975                     |
| MOF+n-butanol                  |                   | 1.447                     | 0.974                     |
| MOF+ethoxyethanol              |                   | 1.443                     | 0.972                     |
| MOF+ethyl acetate              |                   | 1.227                     | -                         |
| MOF+butyl acetate              |                   | 1.229                     | -                         |
| MOF+acetone                    |                   | 1.231                     | -                         |
| MOF+TBHP                       | 1.470             | 1.455                     | 0.981                     |
| MOF+methanol+TBHP              | 1.464             | 1.432/1.455               | 0.992/0.991               |
| MOF+ <i>tert</i> -butanol+TBHP | 1.468             | 1.471/1.444               | 0.972/0.981               |

\* r(O-O) was fixed in calculation for the isolated gas phase TBHP. Experimental value was 1.473 Å [1].

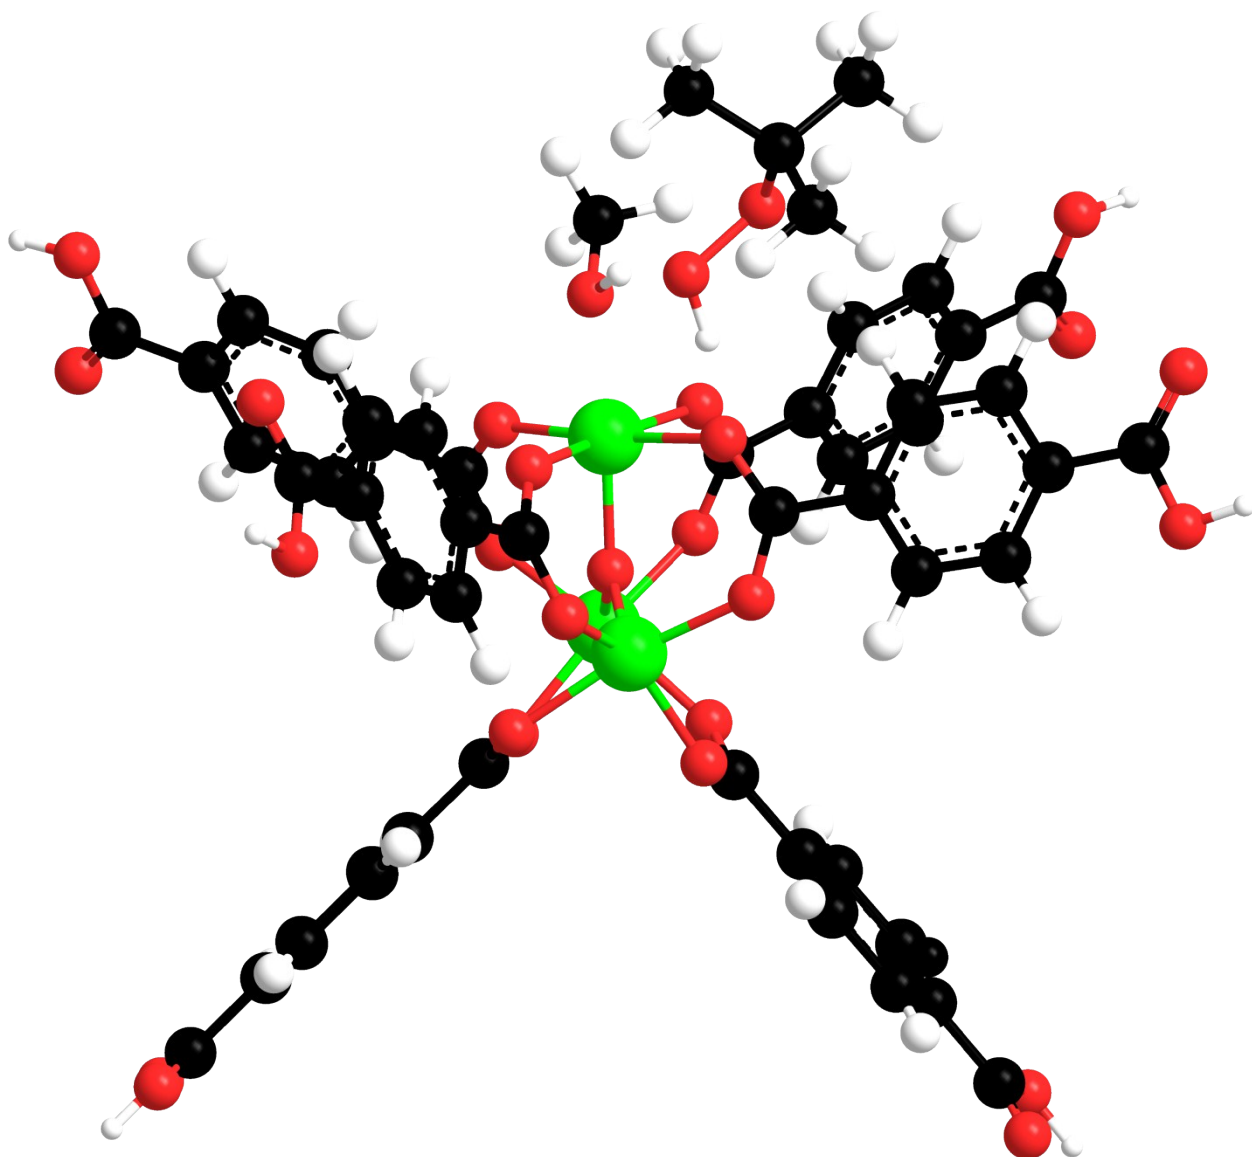

**Figure S1.** A model of methanol and TBHP binding with active site of Cr-MIL-101. Black, white, red, and green atoms correspond to carbon, hydrogen, oxygen, and chromium, respectively.

## References

- 
1. Kosnikov A.Yu., Antonovskii V.L., Lindeman S.V., Antipin M.Yu., Struchkov Yu.T., Turovskii N.A., Zyat'kov I.P. X-ray crystallographic and quantum-chemical investigation of tert-butyl hydroperoxide // *Theoretical and Experimental Chemistry*. – 1989. – Vol. 25. - Iss. 1. – P. 73 – 77.
